# Supplementary material for: Novel benzothiazole-indole acetamides as potential anticancer agents: synthesis, biological evaluation, and in silico studies
Source: Royal Society of Chemistry journal article supplement (doi:10.1039/d5ra08263c), 2026-06-03
Supplement: d5ra08263c1.pdf [file d5ra08263c1.pdf]

**Novel benzothiazole-indole acetamides as potential anticancer agents: synthesis,  
biological evaluation, and *in silico* studies**

**Supplementary data**

**Figure S1.** The  $^1\text{H}$ -NMR spectrum of **9a**.

**Figure S2.** The  $^{13}\text{C}$ -NMR spectrum of **9a**.

**Figure S3.** The  $^1\text{H}$ -NMR spectrum of **9b**.

**Figure S4.** The  $^{13}\text{C}$ -NMR spectrum of **9b**.

**Figure S5.** The  $^1\text{H}$ -NMR spectrum of **9c**.

**Figure S6.** The  $^{13}\text{C}$ -NMR spectrum of **9c**.

**Figure S7.** The  $^1\text{H}$ -NMR spectrum of **9d**.

**Figure S8.** The  $^{13}\text{C}$ -NMR spectrum of **9d**.

**Figure S9.** The  $^1\text{H}$ -NMR spectrum of **9e**.

**Figure S10.** The  $^{13}\text{C}$ -NMR spectrum of **9e**.

**Figure S11.** The  $^1\text{H}$ -NMR spectrum of **9f**.

**Figure S12.** The  $^{13}\text{C}$ -NMR spectrum of **9f**.

**Figure S13.** The  $^1\text{H}$ -NMR spectrum of **9g**.

**Figure S14.** The  $^{13}\text{C}$ -NMR spectrum of **9g**.

**Figure S15.** The  $^1\text{H}$ -NMR spectrum of **9h**.

**Figure S16.** The  $^{13}\text{C}$ -NMR spectrum of **9h**.

**Figure S17.** The  $^1\text{H}$ -NMR spectrum of **9i**.

**Figure S18.** The  $^{13}\text{C}$ -NMR spectrum of **9i**.

**Figure S19.** The  $^1\text{H}$ -NMR spectrum of **9j**.

**Figure S20.** The  $^{13}\text{C}$ -NMR spectrum of **9j**.

**Figure S21.** The  $^1\text{H}$ -NMR spectrum of **9k**.

**Figure S22.** The  $^{13}\text{C}$ -NMR spectrum of **9k**.

**Figure S23.** The  $^1\text{H}$ -NMR spectrum of **9l**.

**Figure S24.** The  $^{13}\text{C}$ -NMR spectrum of **9l**.

**Figure S25.** The  $^1\text{H}$ -NMR spectrum of **9m**.

**Figure S26.** The  $^{13}\text{C}$ -NMR spectrum of **9m**.

**Figure S27.** The  $^1\text{H}$ -NMR spectrum of **9n**.

**Figure S28.** The  $^{13}\text{C}$ -NMR spectrum of **9n**.

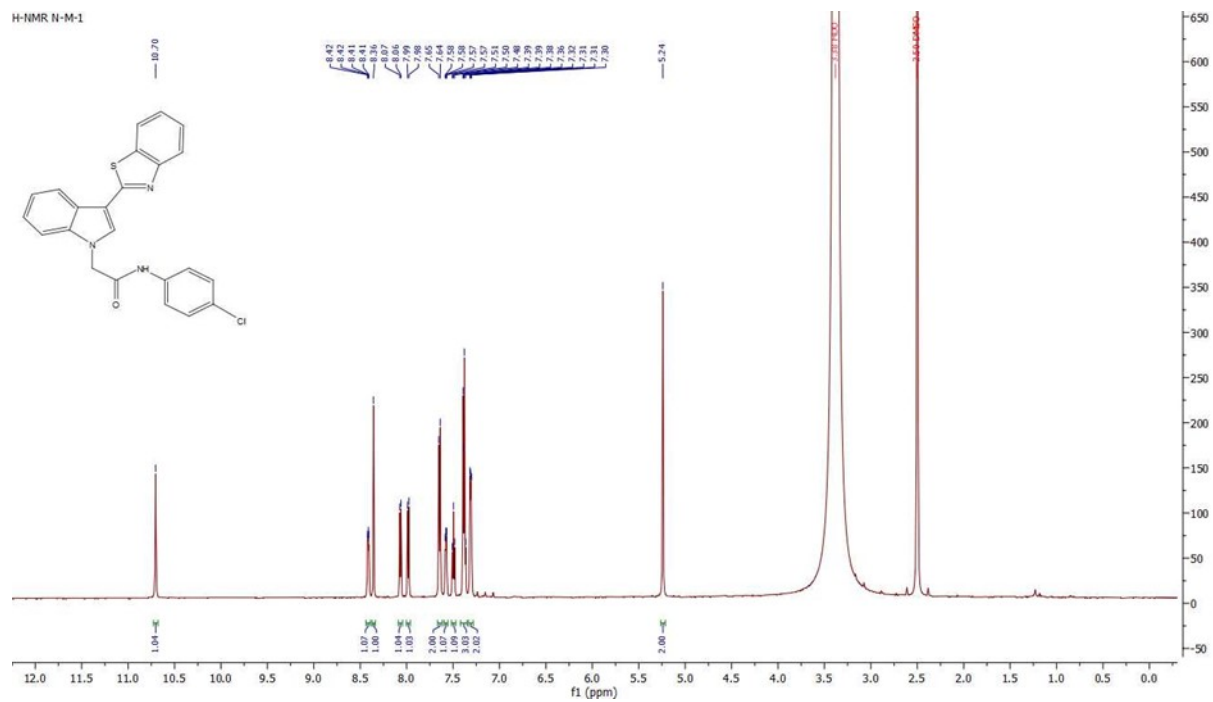

**Figure S1.** The  $^1\text{H-NMR}$  spectrum of **9a**.

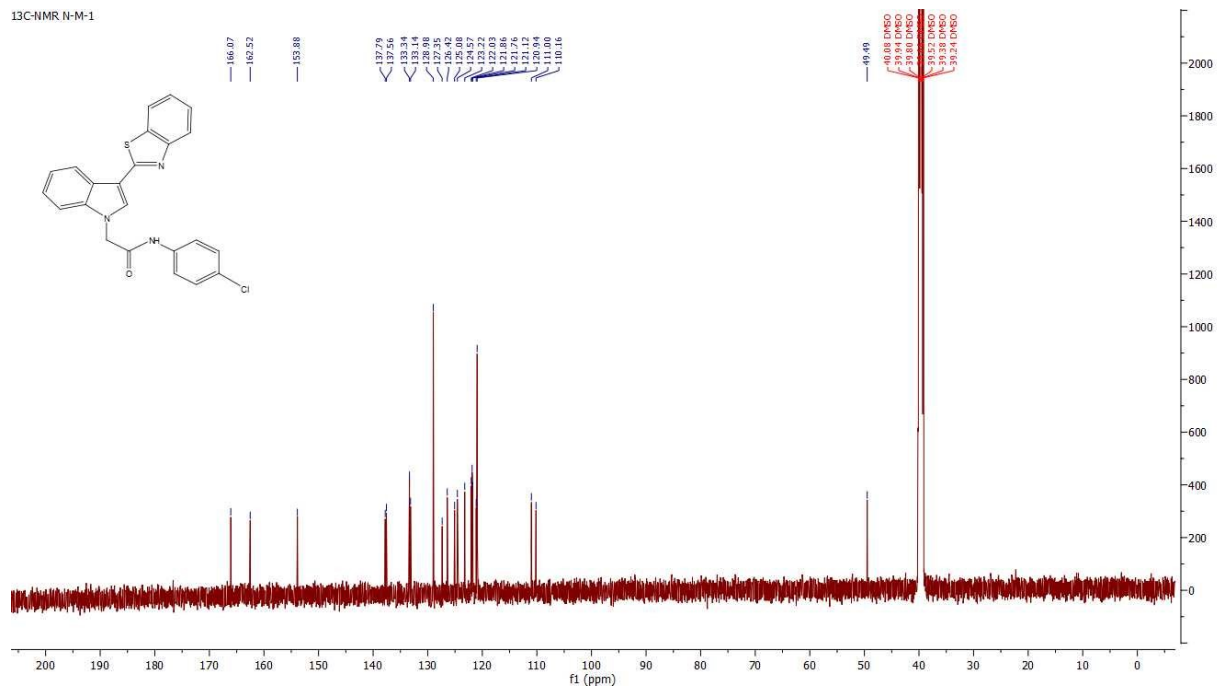

**Figure S2.** The <sup>13</sup>C-NMR spectrum of **9a**.

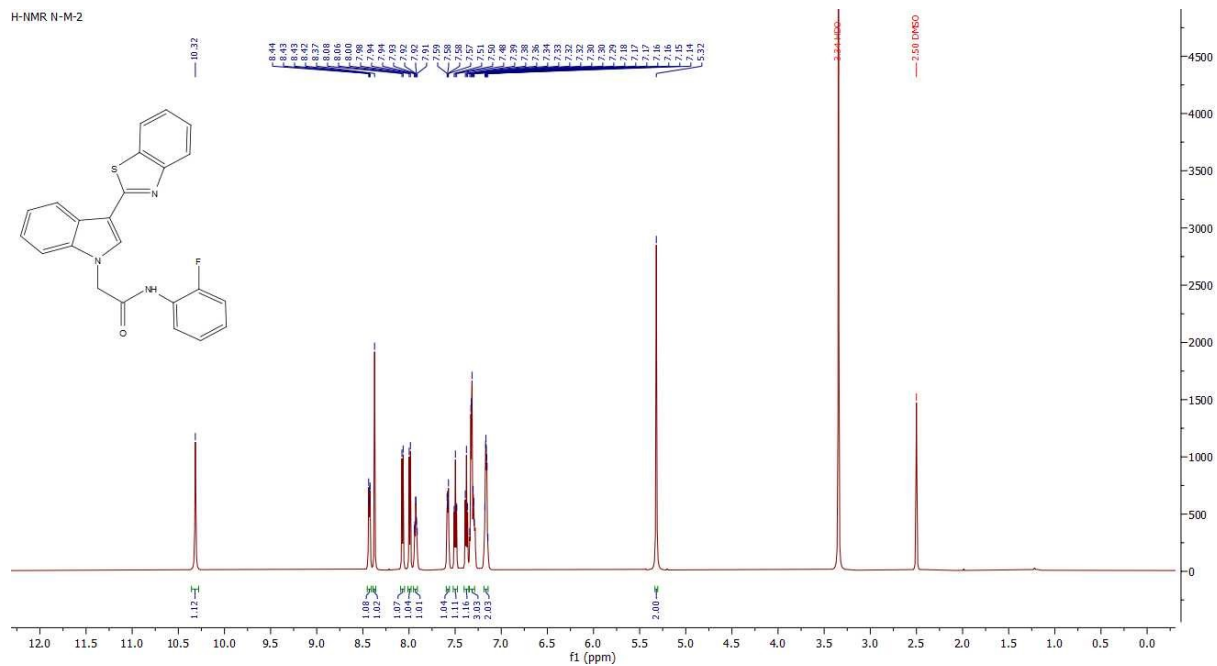

**Figure S3.** The  $^1\text{H}$ -NMR spectrum of **9b**.

<sup>13</sup>C-NMR N-M-2

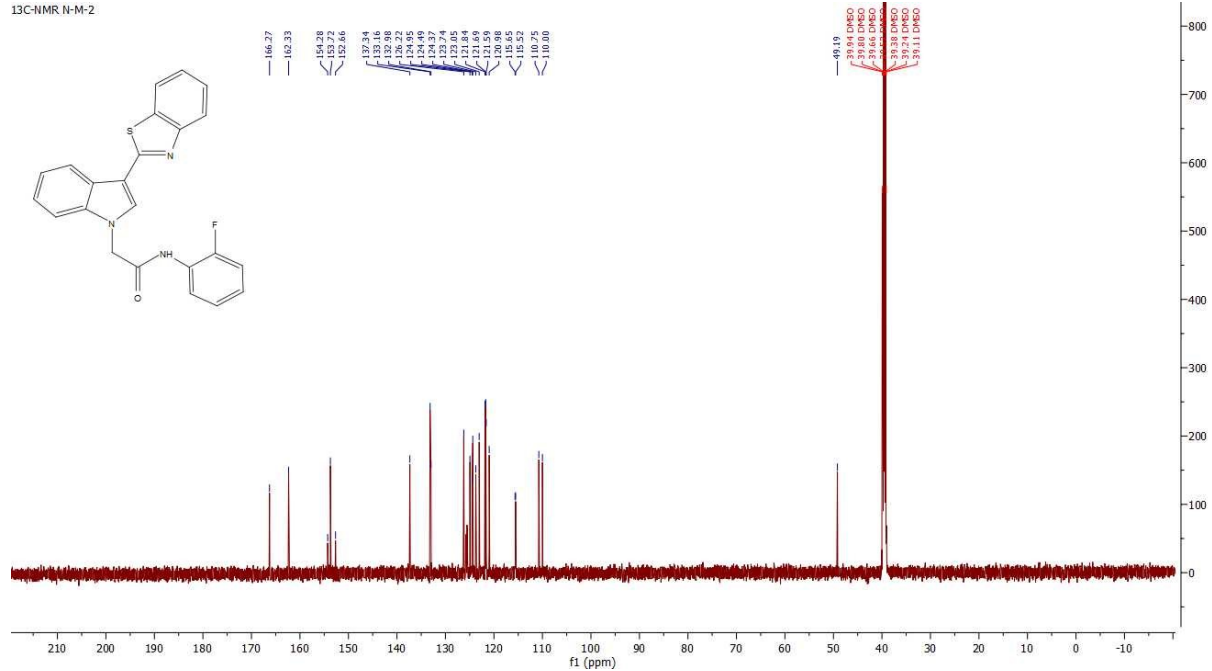

Figure S4. The <sup>13</sup>C-NMR spectrum of 9b.



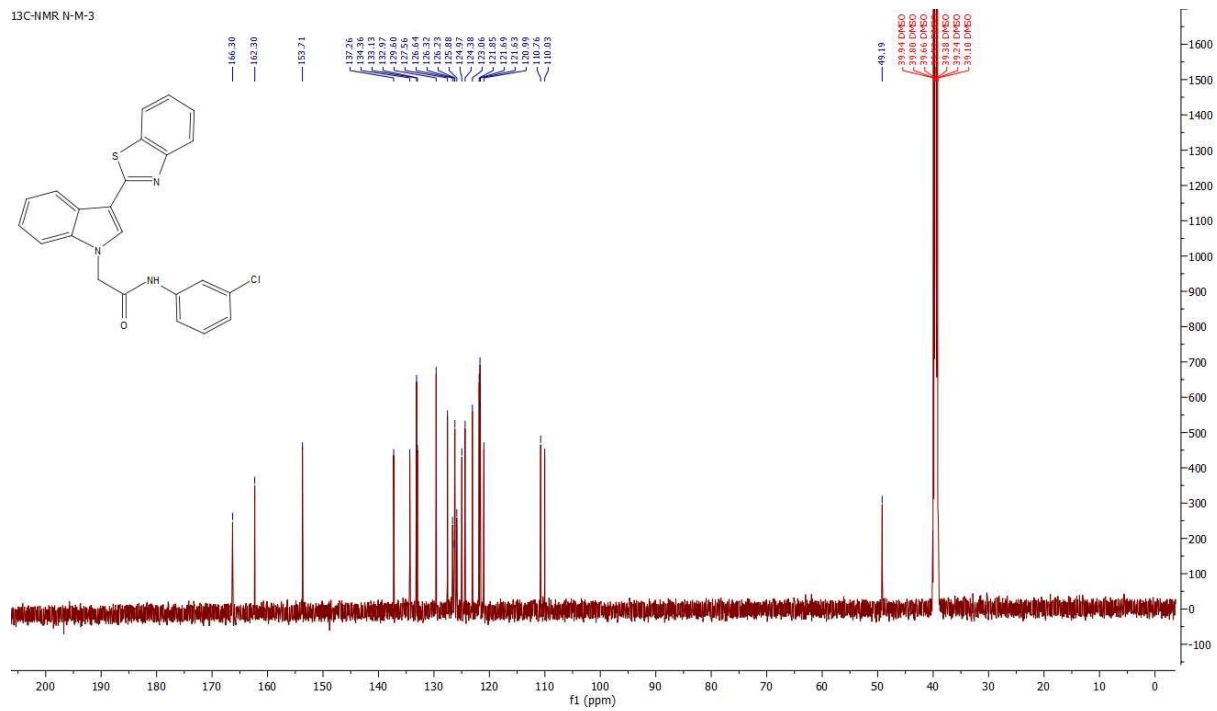

Figure S6. The <sup>13</sup>C-NMR spectrum of 9c.

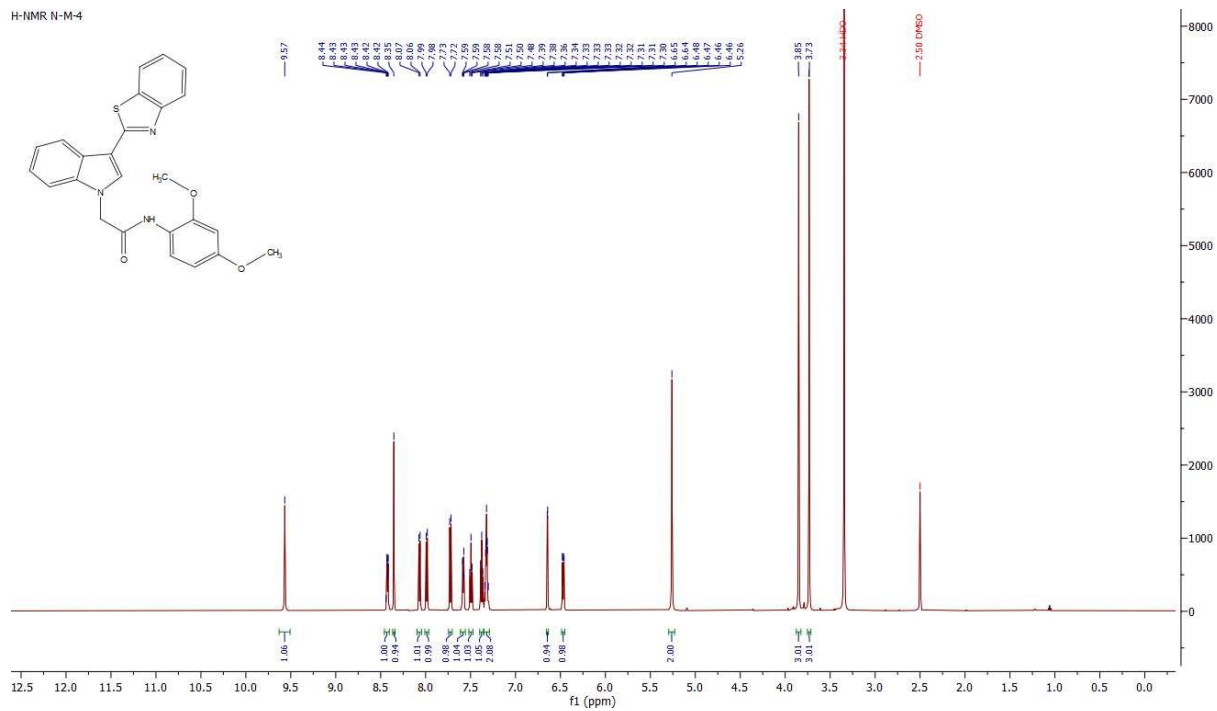

**Figure S7.** The  $^1\text{H-NMR}$  spectrum of **9d**.

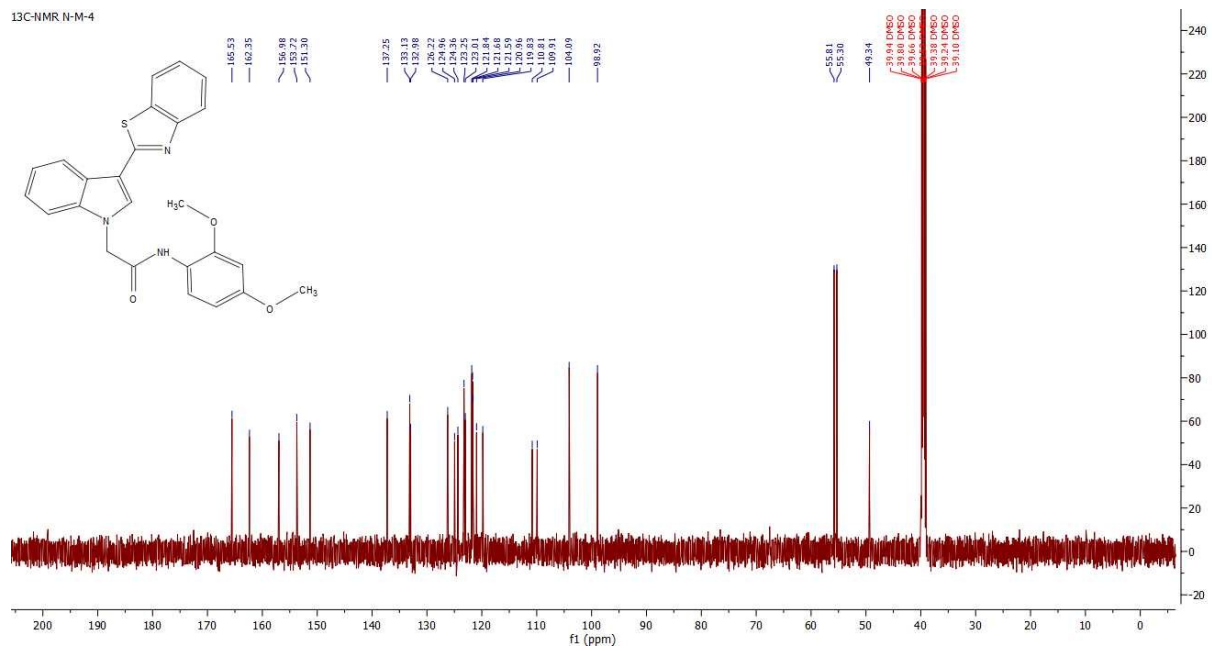

**Figure S8.** The <sup>13</sup>C-NMR spectrum of **9d**.





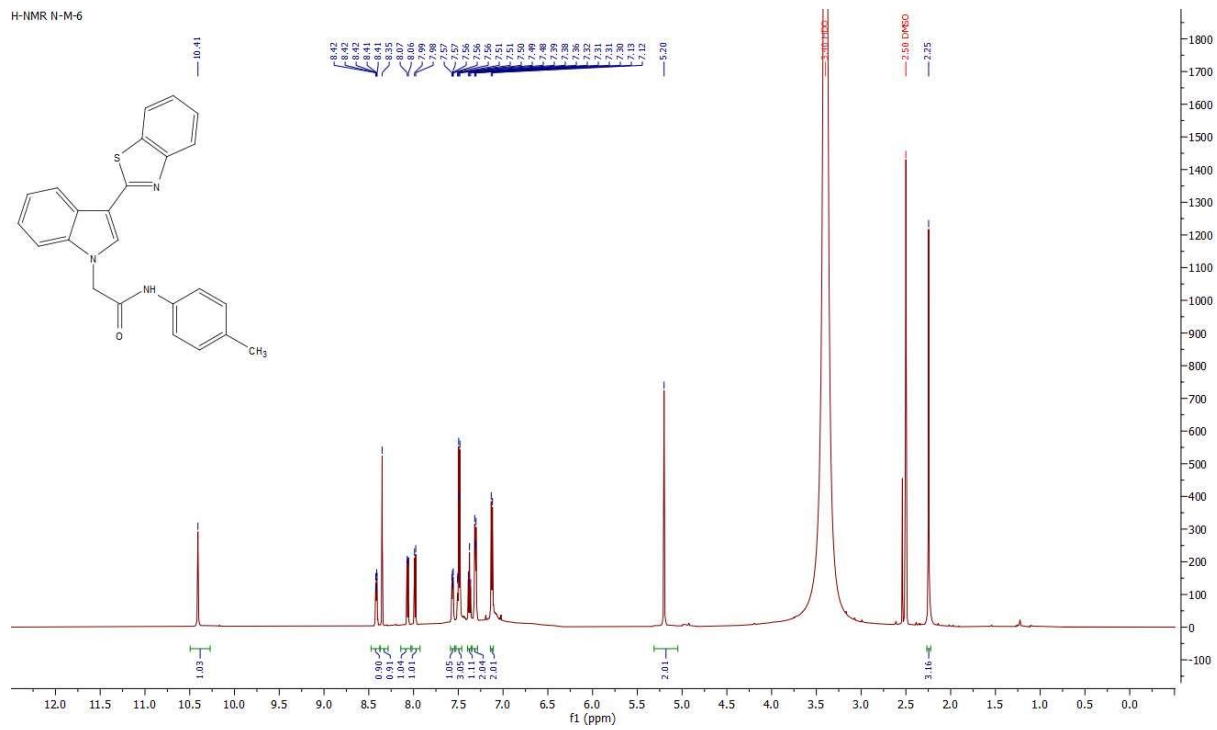

**Figure S11.** The  $^1\text{H-NMR}$  spectrum of **9f**.

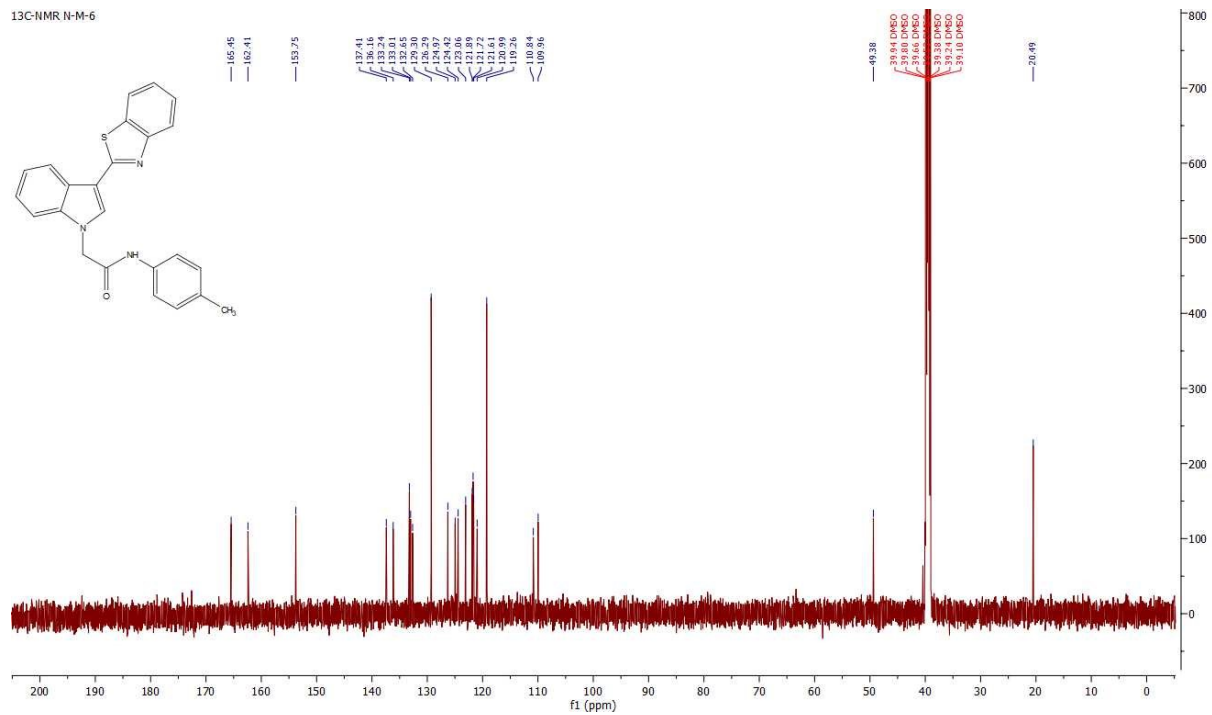

Figure S12. The <sup>13</sup>C-NMR spectrum of 9f.

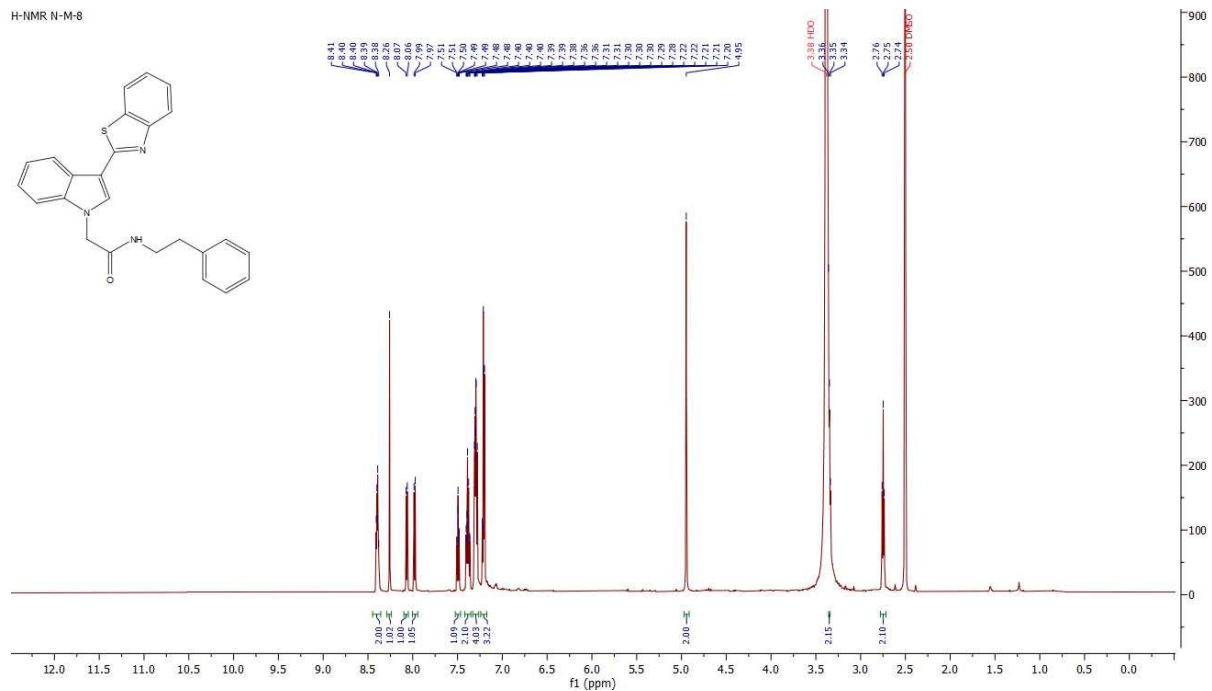

**Figure S13.** The <sup>1</sup>H-NMR spectrum of **9g**.

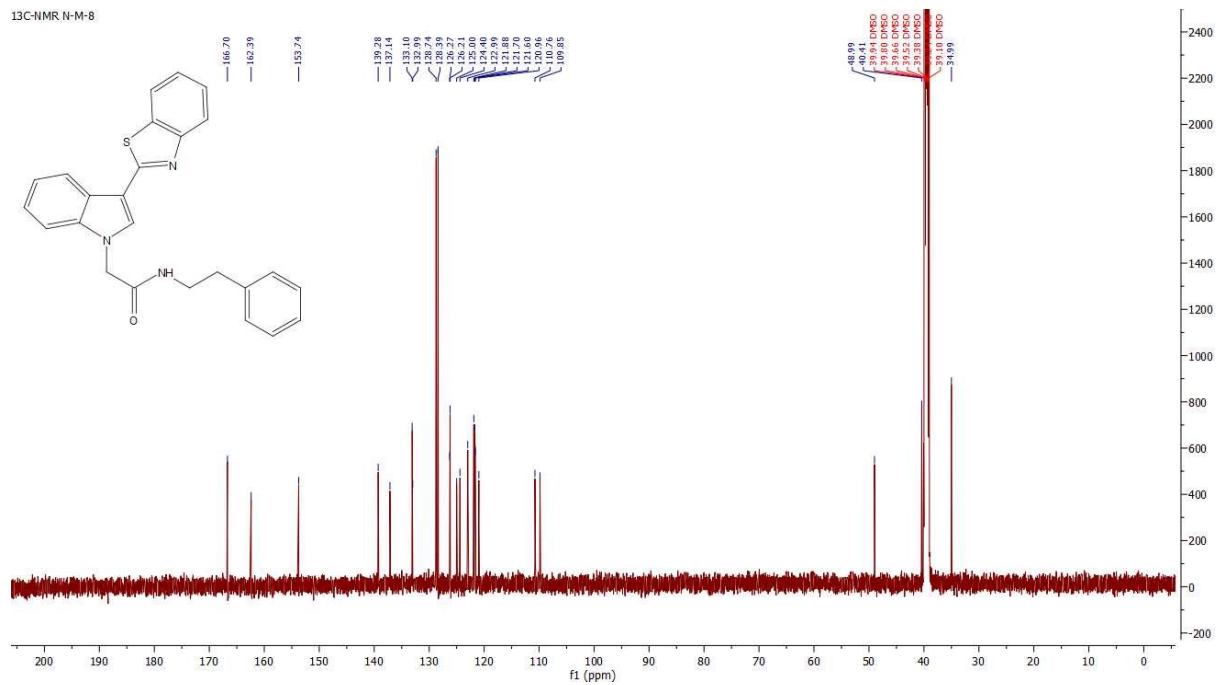

Figure S14. The <sup>13</sup>C-NMR spectrum of 9g.

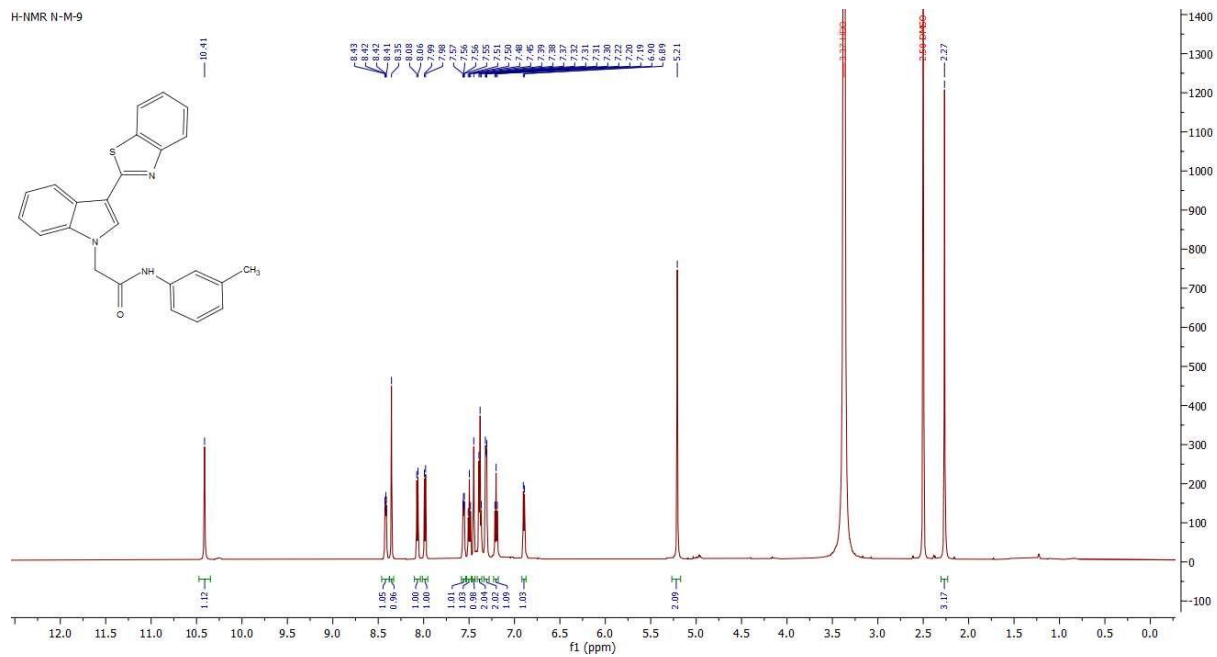

**Figure S15.** The  $^1\text{H}$ -NMR spectrum of **9h**.

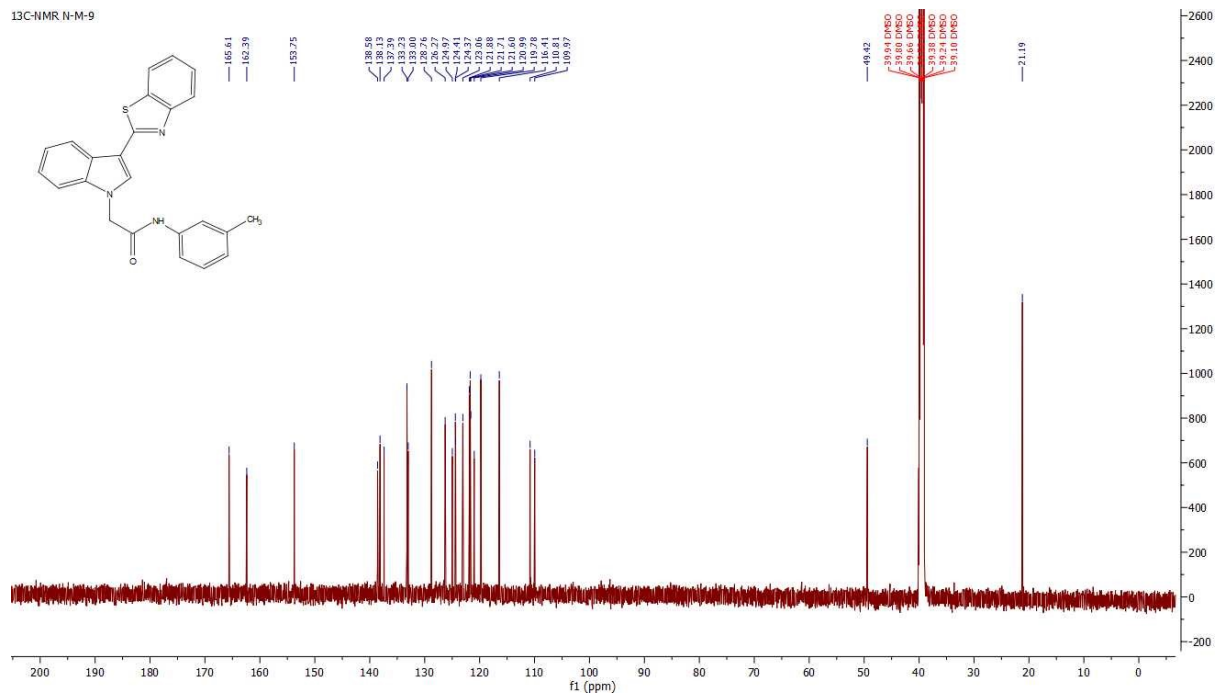

**Figure S16.** The <sup>13</sup>C-NMR spectrum of **9h**.

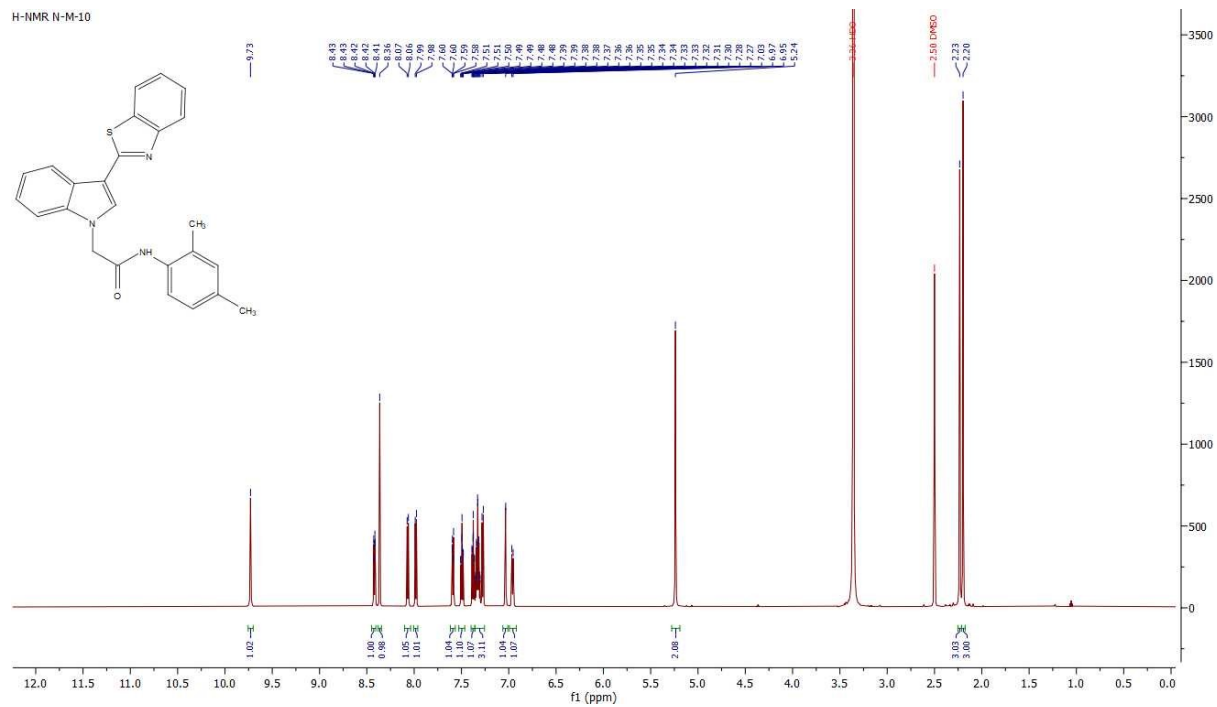

**Figure S17.** The  $^1\text{H}$ -NMR spectrum of **9i**.

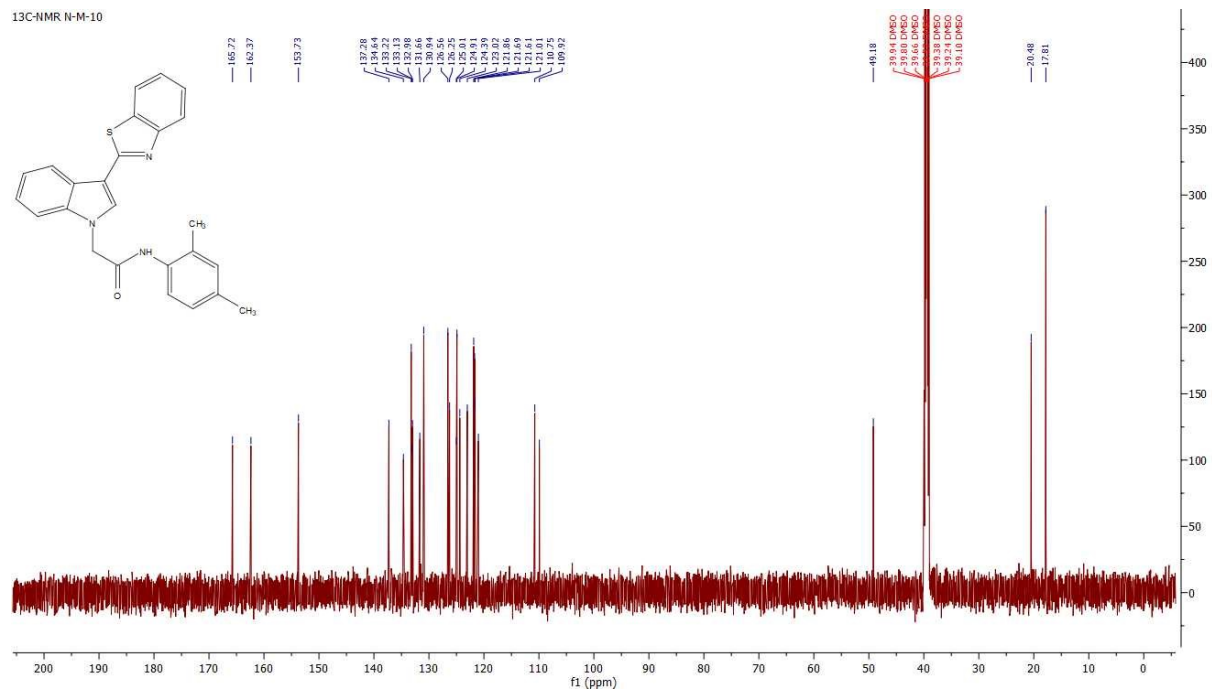

**Figure S18.** The <sup>13</sup>C-NMR spectrum of **9i**.

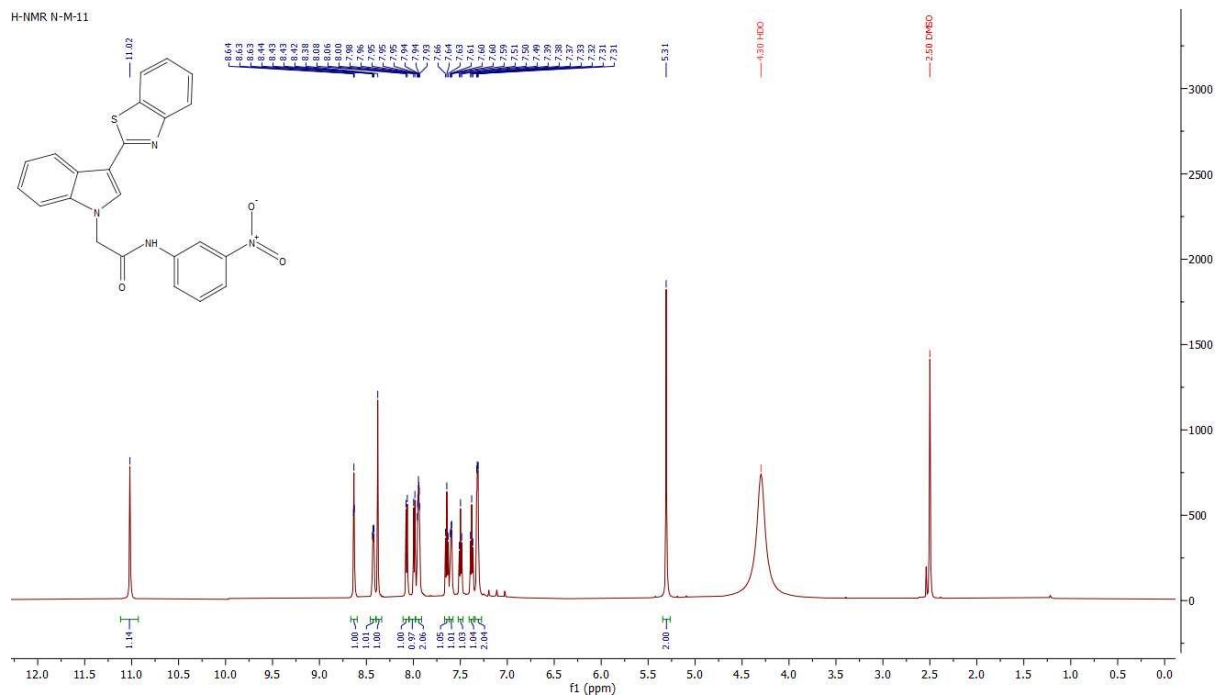

**Figure S19.** The  $^1\text{H-NMR}$  spectrum of **9j**.

<sup>13</sup>C-NMR N-M-11

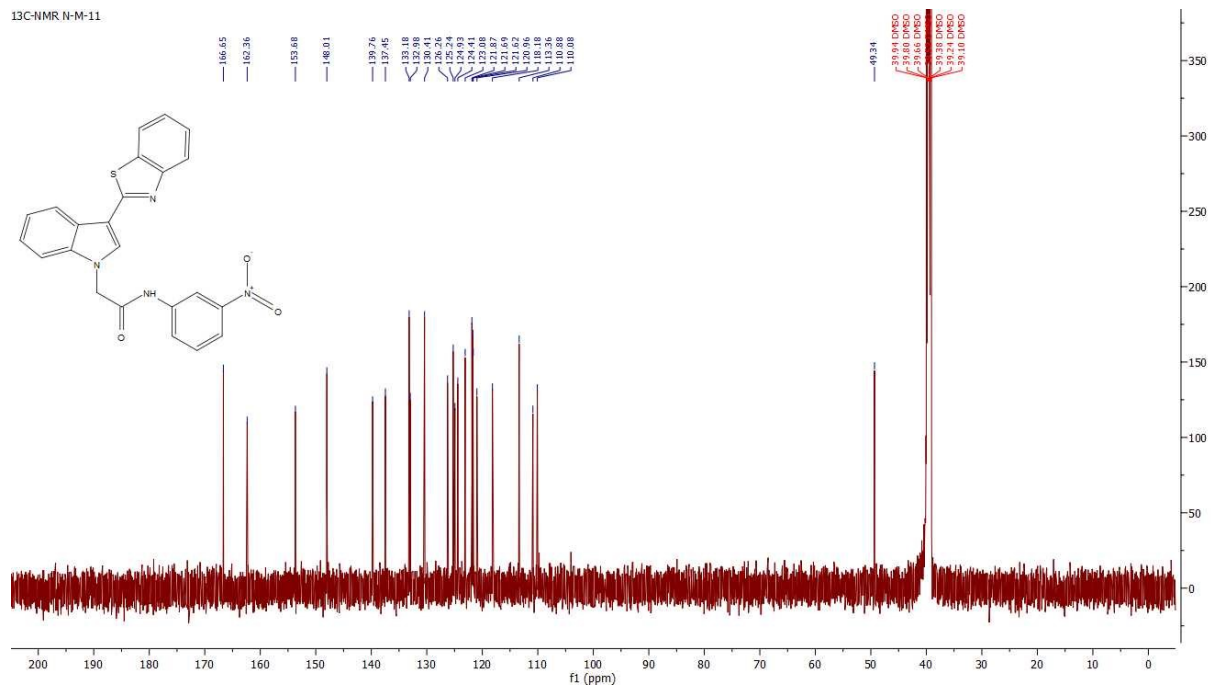

Figure S20. The <sup>13</sup>C-NMR spectrum of 9j.

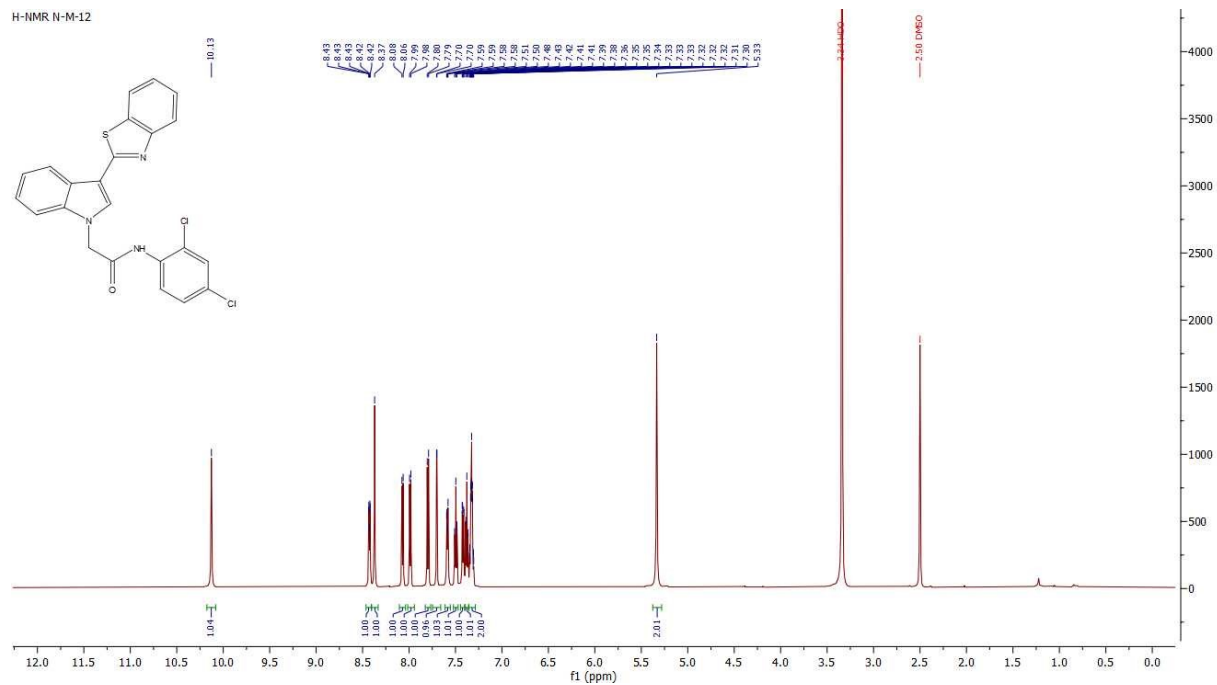

Figure S21. The  $^1\text{H}$ -NMR spectrum of **9k**.



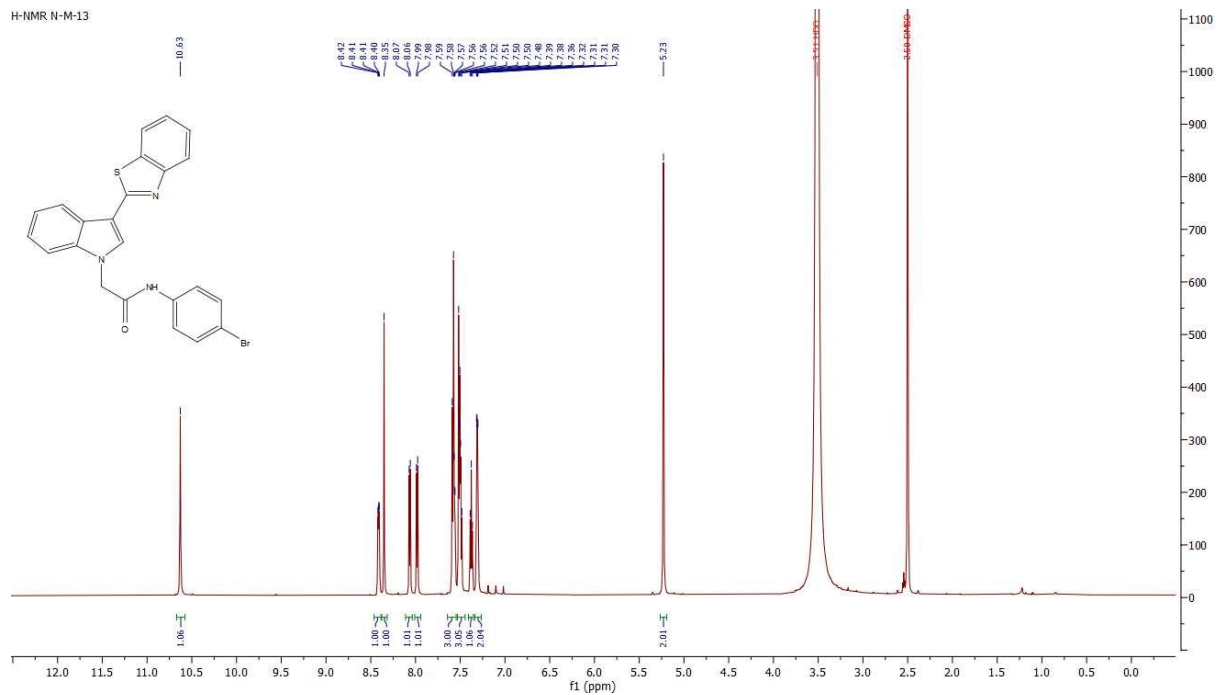

**Figure S23.** The  $^1\text{H}$ -NMR spectrum of **91**.

<sup>13</sup>C-NMR N-M-13

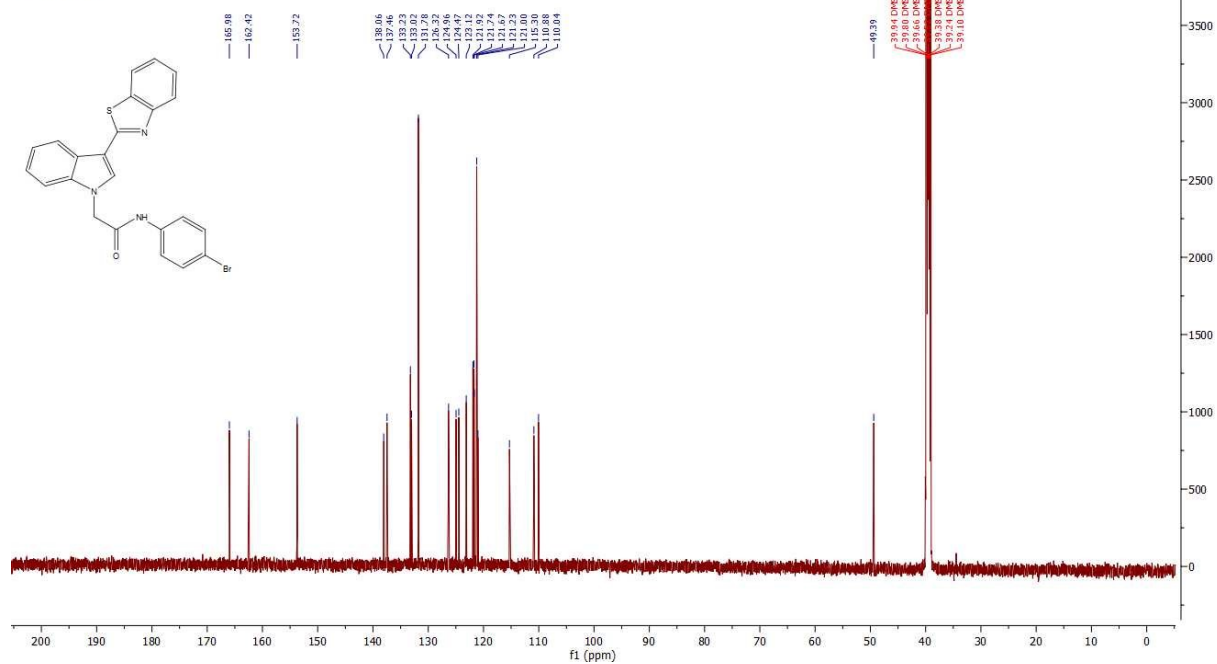

Figure S24. The <sup>13</sup>C-NMR spectrum of 91.

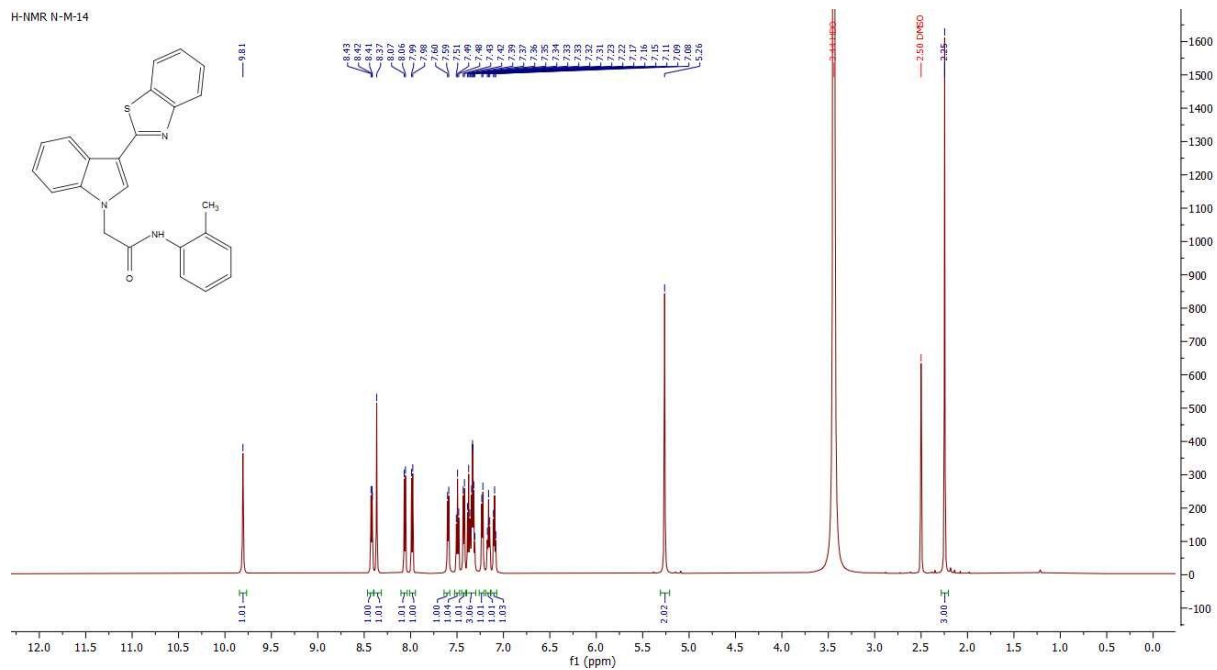

Figure S25. The  $^1\text{H}$ -NMR spectrum of **9m**.

<sup>13</sup>C-NMR N-M-14

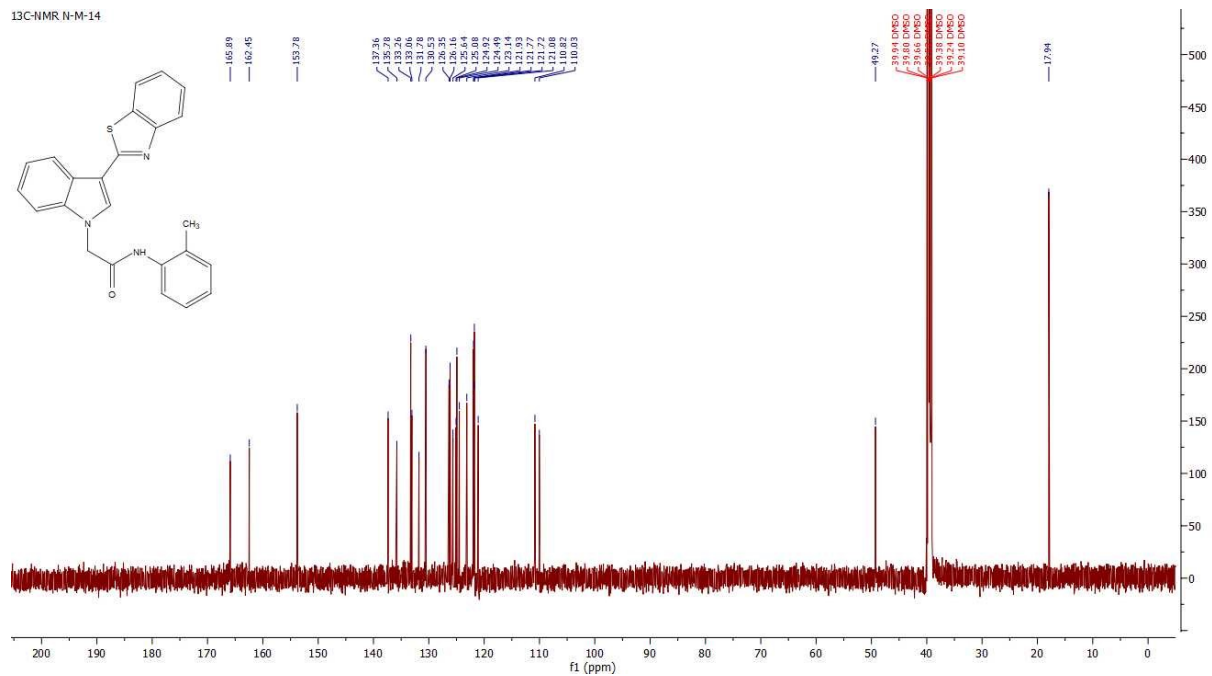

Figure S26. The <sup>13</sup>C-NMR spectrum of 9m.

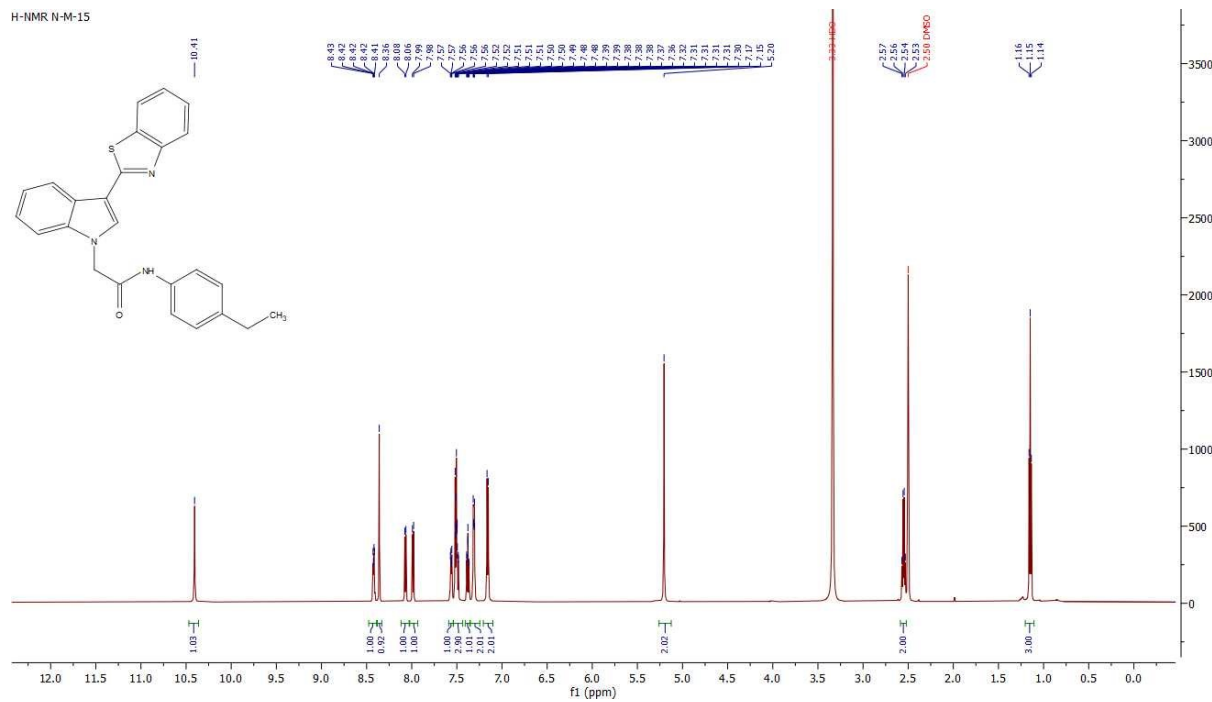

Figure S27. The <sup>1</sup>H-NMR spectrum of **9n**.

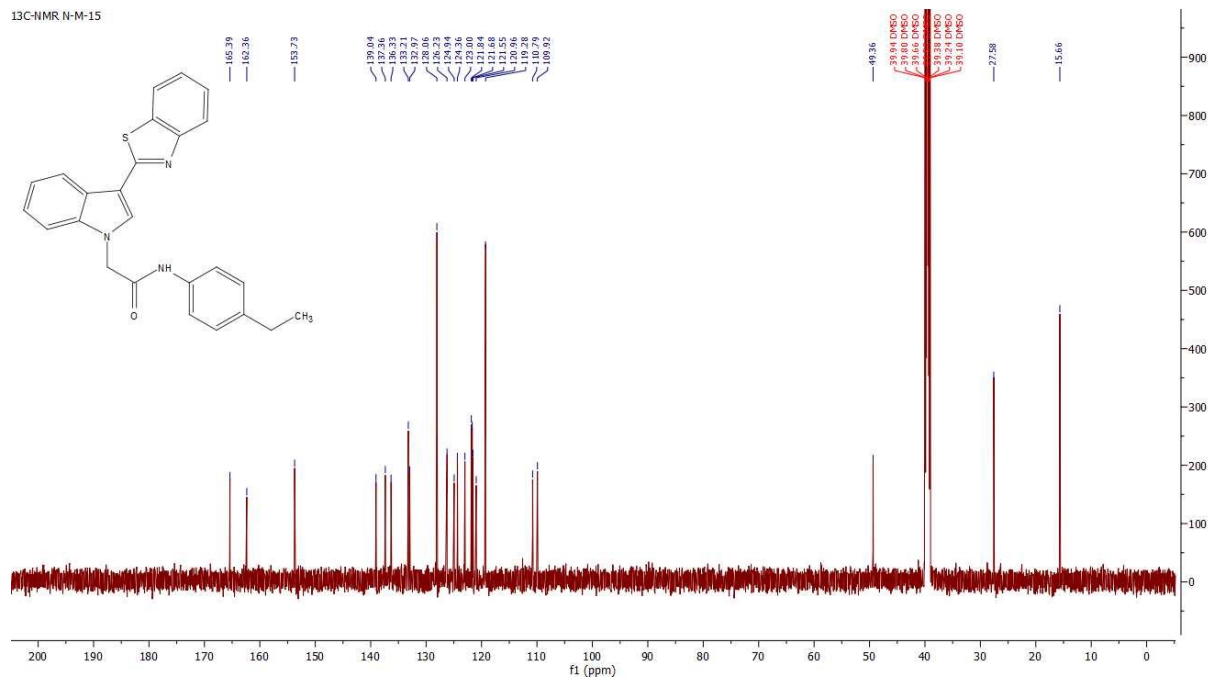

**Figure S28.** The <sup>13</sup>C-NMR spectrum of **9n**.
